# Supplementary material for: Genome-wide analysis suggests a differential microRNA signature associated with normal and diabetic human corneal limbus
Source: PubMed Central journal article supplement (PMC5471258; doi:10.1038/s41598-017-03449-7), 2017-06-14
Supplement: 41598_2017_3449_MOESM2_ESM.pdf [file 41598_2017_3449_MOESM2_ESM.pdf]

**Genome-wide analysis suggests a differential microRNA signature  
associated with normal and diabetic human corneal limbus**

Mangesh Kulkarni<sup>1,2</sup>, Aleksandra Leszczynska<sup>1,2</sup>, Gabbie Wei<sup>1,2</sup>, Michael A. Winkler<sup>1,2</sup>,  
Jie Tang<sup>3</sup>, Vincent A. Funari<sup>3</sup>, Nan Deng<sup>4</sup>, Zhenqiu Liu<sup>4</sup>, Vasu Punj<sup>5</sup>, Sophie X. Deng<sup>6</sup>,  
Alexander V. Ljubimov<sup>1,2,6</sup>, Mehrnoosh Saghizadeh\*<sup>1,2,6</sup>

<sup>1</sup>Biomedical Sciences, <sup>2</sup>Regenerative Medicine Institute Eye Program, <sup>3</sup>Genomics Core,  
<sup>4</sup>Samuel Oschin Comprehensive Cancer Institute, Cedars-Sinai Medical Center; <sup>5</sup>Keck  
School of Medicine, University of Southern California, <sup>6</sup>David Geffen School of Medicine,  
University of California Los Angeles, Los Angeles, California, USA.

- Correspondence to: Dr. Mehrnoosh Saghizadeh, Eye Program, Regenerative  
Medicine Institute, Cedars-Sinai Medical Center, 8700 Beverly Boulevard, AHSP-  
A8109, Los Angeles, CA 90048, USA. Tel. 1-310-248-8696, e-mail  
[ghiamm@cshs.org](mailto:ghiamm@cshs.org)

**Supplementary Table S1.** Differentially regulated microRNA expression in normal limbus vs. central cornea (FDR adjusted p-value <0.05)

| <b>ID</b>              | <b>miRBase accession number</b> | <b>p-value</b> | <b>FDR-adjusted p-value</b> | <b>Fold-Change</b> |
|------------------------|---------------------------------|----------------|-----------------------------|--------------------|
| <b>hsa-miR-143-3p</b>  | MIMAT0000435                    | 9.53E-10       | 1.18E-07                    | 43.02              |
| <b>hsa-miR-10b-5p</b>  | MIMAT0000254                    | 1.11E-08       | 6.89E-07                    | 91.84              |
| <b>hsa-miR-10a-5p</b>  | MIMAT0000253                    | 5.98E-07       | 2.47E-05                    | 10.57              |
| <b>hsa-miR-184</b>     | MIMAT0000454                    | 9.56E-06       | 0.0003                      | -1.91              |
| <b>hsa-miR-181a-5p</b> | MIMAT0000256                    | 1.66E-05       | 0.0004                      | -1.63              |
| <b>hsa-miR-126-5p</b>  | MIMAT0000444                    | 0.0001         | 0.0022                      | 89.42              |
| <b>hsa-miR-99a-5p</b>  | MIMAT0000097                    | 0.0001         | 0.0023                      | 1.85               |
| <b>hsa-miR-186-5p</b>  | MIMAT0000456                    | 0.0001         | 0.0023                      | 1.90               |
| <b>hsa-miR-127-3p</b>  | MIMAT0000446                    | 0.0003         | 0.0037                      | 62.28              |
| <b>hsa-miR-199b-3p</b> | MIMAT00004563                   | 0.0003         | 0.0042                      | 2.16               |
| <b>hsa-miR-146b-5p</b> | MIMAT0002809                    | 0.0005         | 0.0046                      | 2.44               |
| <b>hsa-miR-21-5p</b>   | MIMAT0000076                    | 0.0004         | 0.0046                      | 3.52               |
| <b>hsa-miR-211-5p</b>  | MIMAT0000268                    | 0.0005         | 0.0046                      | 5.97               |
| <b>hsa-miR-146a-5p</b> | MIMAT0000449                    | 0.0006         | 0.0052                      | 70.20              |
| <b>hsa-miR-92a-3p</b>  | MIMAT0000092                    | 0.0010         | 0.0079                      | 1.58               |
| <b>hsa-let-7i-5p</b>   | MIMAT0000415                    | 0.0012         | 0.0095                      | 2.07               |
| <b>hsa-miR-30a-5p</b>  | MIMAT0000087                    | 0.0014         | 0.0099                      | 1.65               |
| <b>hsa-miR-199a-3p</b> | MIMAT0000232                    | 0.0014         | 0.0099                      | 2.31               |
| <b>hsa-miR-27b-3p</b>  | MIMAT0000419                    | 0.0016         | 0.0103                      | 1.84               |
| <b>hsa-miR-486-5p</b>  | MIMAT0002177                    | 0.0019         | 0.0117                      | -2.66              |
| <b>hsa-miR-26a-5p</b>  | MIMAT0000082                    | 0.0021         | 0.0124                      | 1.77               |
| <b>hsa-miR-23b-3p</b>  | MIMAT0000418                    | 0.0024         | 0.0138                      | 1.63               |
| <b>hsa-miR-30d-5p</b>  | MIMAT0000245                    | 0.0037         | 0.0198                      | 1.40               |
| <b>hsa-miR-342-3p</b>  | MIMAT0000753                    | 0.0048         | 0.0250                      | 1.71               |
| <b>hsa-let-7c-5p</b>   | MIMAT0000064                    | 0.0080         | 0.0397                      | 1.58               |
| <b>hsa-miR-26b-5p</b>  | MIMAT0000083                    | 0.0086         | 0.0409                      | 2.35               |
| <b>hsa-miR-378a-3p</b> | MIMAT0000732                    | 0.0097         | 0.0440                      | -1.55              |
| <b>hsa-miR-181b-5p</b> | MIMAT0000257                    | 0.0099         | 0.0440                      | -1.36              |
| <b>hsa-miR-151a-3p</b> | MIMAT0000757                    | 0.0112         | 0.0465                      | 1.48               |
| <b>hsa-miR-501-3p</b>  | MIMAT0004774                    | 0.0110         | 0.0465                      | 1.91               |
| <b>hsa-miR-199a-5p</b> | MIMAT0000231                    | 0.0126         | 0.0505                      | 1.95               |
| <b>hsa-miR-181a-3p</b> | MIMAT0000270                    | 0.0133         | 0.0516                      | -1.78              |
| <b>hsa-miR-365b-3p</b> | MIMAT0022834                    | 0.0146         | 0.0533                      | -2.08              |

|                          |              |        |        |       |
|--------------------------|--------------|--------|--------|-------|
| <b>hsa-miR-125b-2-3p</b> | MIMAT0004603 | 0.0143 | 0.0533 | 19.14 |
| hsa-miR-30a-3p           | MIMAT0000088 | 0.0177 | 0.0626 | 1.45  |
| hsa-miR-182-5p           | MIMAT0000259 | 0.0184 | 0.0634 | -1.59 |
| hsa-miR-30e-5p           | MIMAT0000692 | 0.0195 | 0.0653 | 1.97  |
| hsa-let-7d-3p            | MIMAT0004484 | 0.0209 | 0.0683 | 1.69  |
| hsa-miR-195-5p           | MIMAT0000461 | 0.0250 | 0.0796 | 2.00  |
| hsa-miR-28-5p            | MIMAT0000085 | 0.0259 | 0.0802 | 15.43 |
| hsa-miR-29a-3p           | MIMAT0000086 | 0.0289 | 0.0874 | 1.46  |
| hsa-miR-335-5p           | MIMAT0000765 | 0.0330 | 0.0974 | 10.14 |
| hsa-miR-107              | MIMAT0000104 | 0.0346 | 0.0997 | 1.49  |
| hsa-miR-181a-2-3p        | MIMAT0004558 | 0.0359 | 0.1010 | -1.56 |
| hsa-miR-16-5p            | MIMAT0000069 | 0.0448 | 0.1219 | 1.65  |
| hsa-miR-140-3p           | MIMAT0004597 | 0.0452 | 0.1219 | 7.99  |
| hsa-miR-532-5p           | MIMAT0002888 | 0.0500 | 0.1342 | 1.61  |

**Supplementary Table S2.** Differentially regulated microRNA expression in diabetic limbus vs. central cornea (FDR adjusted p-value < 0.05)

| <b>ID</b>              | <b>miRBase accession number</b> | <b>p-value</b> | <b>FDR-adjusted p-value</b> | <b>Fold Change</b> |
|------------------------|---------------------------------|----------------|-----------------------------|--------------------|
| <b>hsa-miR-126-5p</b>  | MIMAT0000444                    | 6.48E-09       | 9.65E-07                    | 55.02              |
| <b>hsa-miR-143-3p</b>  | MIMAT0000435                    | 1.86E-08       | 1.39E-06                    | 57.39              |
| <b>hsa-miR-10a-5p</b>  | MIMAT0000253                    | 8.01E-08       | 3.98E-06                    | 15.30              |
| <b>hsa-miR-10b-5p</b>  | MIMAT0000254                    | 1.02E-06       | 3.78E-05                    | 88.05              |
| <b>hsa-miR-21-5p</b>   | MIMAT0000076                    | 1.27E-06       | 3.79E-05                    | 3.61               |
| <b>hsa-miR-25-3p</b>   | MIMAT0000081                    | 9.73E-05       | 0.0021                      | 2.12               |
| <b>hsa-miR-26b-5p</b>  | MIMAT0000083                    | 0.0001         | 0.0021                      | 2.51               |
| <b>hsa-miR-127-3p</b>  | MIMAT0000446                    | 0.0001         | 0.0024                      | 74.44              |
| <b>hsa-miR-126-3p</b>  | MIMAT0000445                    | 0.0001         | 0.0024                      | 55.28              |
| <b>hsa-let-7i-5p</b>   | MIMAT0000415                    | 0.0002         | 0.0024                      | 2.53               |
| <b>hsa-miR-184</b>     | MIMAT0000454                    | 0.0004         | 0.0053                      | -1.92              |
| <b>hsa-miR-23b-3p</b>  | MIMAT0000418                    | 0.0005         | 0.0061                      | 2.22               |
| <b>hsa-miR-30a-5p</b>  | MIMAT0000087                    | 0.0006         | 0.0074                      | 2.27               |
| <b>hsa-miR-30a-3p</b>  | MIMAT0000088                    | 0.0011         | 0.0100                      | 2.41               |
| <b>hsa-miR-30d-5p</b>  | MIMAT0000245                    | 0.0011         | 0.0100                      | 1.76               |
| <b>hsa-miR-99a-5p</b>  | MIMAT0000097                    | 0.0011         | 0.0100                      | 2.29               |
| <b>hsa-miR-146a-5p</b> | MIMAT0000449                    | 0.0015         | 0.0127                      | 44.11              |
| <b>hsa-miR-181c-5p</b> | MIMAT0000258                    | 0.0017         | 0.0130                      | 3.15               |
| <b>hsa-miR-146b-5p</b> | MIMAT0002809                    | 0.0020         | 0.0152                      | 2.59               |
| <b>hsa-miR-27b-3p</b>  | MIMAT0000419                    | 0.0022         | 0.0153                      | 2.06               |
| <b>hsa-miR-148b-3p</b> | MIMAT0000759                    | 0.0026         | 0.0176                      | 1.75               |
| <b>hsa-miR-151a-3p</b> | MIMAT0000757                    | 0.0028         | 0.0178                      | 2.00               |
| <b>hsa-miR-186-5p</b>  | MIMAT0000456                    | 0.0037         | 0.0203                      | 1.87               |
| <b>hsa-miR-26a-5p</b>  | MIMAT0000082                    | 0.0037         | 0.0203                      | 2.03               |
| <b>hsa-miR-148a-3p</b> | MIMAT0000243                    | 0.0042         | 0.0203                      | 1.43               |
| <b>hsa-miR-501-3p</b>  | MIMAT0004774                    | 0.0054         | 0.0251                      | 2.53               |
| <b>hsa-let-7c-5p</b>   | MIMAT0000064                    | 0.0066         | 0.0287                      | 2.01               |
| <b>hsa-miR-199a-3p</b> | MIMAT0000232                    | 0.0067         | 0.0287                      | 2.36               |
| <b>hsa-miR-199b-3p</b> | MIMAT0004563                    | 0.0081         | 0.0329                      | 2.41               |
| <b>hsa-miR-192-5p</b>  | MIMAT0000222                    | 0.0084         | 0.0329                      | 1.55               |
| <b>hsa-miR-30e-5p</b>  | MIMAT0000692                    | 0.0086         | 0.0329                      | 2.42               |
| <b>hsa-miR-211-5p</b>  | MIMAT0000268                    | 0.0086         | 0.0329                      | 27.61              |
| <b>hsa-let-7b-5p</b>   | MIMAT0000063                    | 0.0099         | 0.0367                      | 1.67               |
| <b>hsa-miR-342-3p</b>  | MIMAT0000753                    | 0.0104         | 0.0367                      | 1.85               |

|                       |              |        |        |       |
|-----------------------|--------------|--------|--------|-------|
| <b>hsa-miR-19b-3p</b> | MIMAT0000074 | 0.0132 | 0.0456 | 22.04 |
| <b>hsa-miR-107</b>    | MIMAT0000104 | 0.0137 | 0.0462 | 2.05  |
| hsa-miR-28-3p         | MIMAT0004502 | 0.0188 | 0.0610 | 8.22  |
| hsa-miR-130a-3p       | MIMAT0000425 | 0.0241 | 0.0764 | 8.64  |
| hsa-miR-24-3p         | MIMAT0000080 | 0.0246 | 0.0764 | 10.03 |
| hsa-miR-30b-5p        | MIMAT0000420 | 0.0255 | 0.0775 | 8.10  |
| hsa-miR-532-5p        | MIMAT0002888 | 0.0317 | 0.0945 | 5.94  |
| hsa-miR-374a-5p       | MIMAT0000727 | 0.0342 | 0.0991 | 5.64  |
| hsa-miR-92b-3p        | MIMAT0003218 | 0.0350 | 0.0991 | 8.10  |
| hsa-miR-21-3p         | MIMAT0004494 | 0.0356 | 0.0991 | 6.91  |
| hsa-miR-769-5p        | MIMAT0003886 | 0.0359 | 0.0991 | 7.35  |
| hsa-miR-221-3p        | MIMAT0000278 | 0.0394 | 0.1068 | 7.98  |
| hsa-miR-222-3p        | MIMAT0000279 | 0.0407 | 0.1083 | 4.47  |
| hsa-miR-30e-3p        | MIMAT0000693 | 0.0469 | 0.1225 | 7.30  |
| hsa-miR-92a-3p        | MIMAT0000092 | 0.0478 | 0.1228 | 7.61  |
| hsa-miR-29a-3p        | MIMAT0000086 | 0.0500 | 0.1345 | 8.53  |

**Supplementary Table S3.** Differentially regulated microRNA expression in diabetic vs. normal limbus (p-value <0.05)

| <b>ID</b>              | <b>miRBase accession number</b> | <b>p-value</b> | <b>Fold Change</b> |
|------------------------|---------------------------------|----------------|--------------------|
| <b>hsa-miR-365a-3p</b> | MIMAT0000710                    | 0.002          | -22.95             |
| <b>hsa-miR-30a-3p</b>  | MIMAT0000088                    | 0.003          | 1.55               |
| <b>hsa-miR-92b-3p</b>  | MIMAT0003218                    | 0.005          | -1.52              |
| <b>hsa-miR-10b-5p</b>  | MIMAT0000254                    | 0.010          | 1.59               |
| <b>hsa-miR-3065-5p</b> | MIMAT0015066                    | 0.013          | 2.71               |
| <b>hsa-miR-214-3p</b>  | MIMAT0000271                    | 0.014          | 5.59               |
| <b>hsa-miR-25-3p</b>   | MIMAT0000081                    | 0.017          | 1.39               |
| <b>hsa-miR-425-5p</b>  | MIMAT0003393                    | 0.023          | -4.11              |
| <b>hsa-miR-328-3p</b>  | MIMAT0000752                    | 0.032          | 3.32               |
| <b>hsa-miR-769-5p</b>  | MIMAT0003886                    | 0.035          | 1.40               |
| <b>hsa-let-7d-3p</b>   | MIMAT0004484                    | 0.036          | -2.57              |
| <b>hsa-miR-155-5p</b>  | MIMAT0000646                    | 0.037          | 2.83               |
| <b>hsa-miR-146a-5p</b> | MIMAT0000449                    | 0.038          | 1.41               |
| <b>hsa-miR-381-3p</b>  | MIMAT0000736                    | 0.038          | 3.01               |
| <b>hsa-miR-3184-5p</b> | MIMAT0015064                    | 0.040          | -16.93             |
| <b>hsa-miR-148b-3p</b> | MIMAT0000759                    | 0.042          | 1.39               |
| <b>hsa-miR-93-5p</b>   | MIMAT0000093                    | 0.044          | -1.33              |
| <b>hsa-miR-338-3p</b>  | MIMAT0000763                    | 0.046          | -9.92              |
| <b>hsa-miR-107</b>     | MIMAT0000104                    | 0.051          | 1.32               |
| <b>hsa-miR-409-3p</b>  | MIMAT0001639                    | 0.053          | 3.30               |

**Supplementary Table S4.** Differentially regulated microRNA expression in T1DM vs. T2DM corneal limbus (FDR adjusted p-value < 0.05)

| <b>ID</b>              | <b>microRNA accession number</b> | <b>p-value</b> | <b>FDR adjusted p-value</b> | <b>Fold Change T1D_Limbus vs T2D_Limbus)</b> |
|------------------------|----------------------------------|----------------|-----------------------------|----------------------------------------------|
| <b>hsa-miR-125a-5p</b> | MIMAT0000443                     | 8.80E-06       | 0.00043712                  | -3.31                                        |
| <b>hsa-miR-99b-5p</b>  | MIMAT0000689                     | 1.64E-05       | 0.000489444                 | -2.48                                        |
| <b>hsa-miR-10a-5p</b>  | MIMAT0000253                     | 0.000151002    | 0.00281241                  | 6.07                                         |
| <b>hsa-miR-100-5p</b>  | MIMAT0000098                     | 0.000349578    | 0.00520871                  | -2.86                                        |
| <b>hsa-miR-191-5p</b>  | MIMAT0000440                     | 0.000347108    | 0.00520871                  | -1.42                                        |
| <b>hsa-miR-25-3p</b>   | MIMAT0000081                     | 0.000411825    | 0.00557836                  | 1.83                                         |
| <b>hsa-miR-151a-3p</b> | MIMAT0000757                     | 0.000461118    | 0.00570264                  | 2.29                                         |
| <b>hsa-miR-199b-5p</b> | MIMAT0000263                     | 0.000607136    | 0.00646167                  | -2.99                                        |
| <b>hsa-let-7i-5p</b>   | MIMAT0000415                     | 0.00107922     | 0.0107203                   | 2.01                                         |
| <b>hsa-miR-23a-3p</b>  | MIMAT0000078                     | 0.00183263     | 0.0160625                   | -1.62                                        |
| <b>hsa-miR-28-3p</b>   | MIMAT0004502                     | 0.00178262     | 0.0160625                   | 1.59                                         |
| <b>hsa-miR-22-3p</b>   | MIMAT0000077                     | 0.00235824     | 0.019521                    | -1.74                                        |
| <b>hsa-miR-24-3p</b>   | MIMAT0000080                     | 0.00266376     | 0.0208895                   | -2.30                                        |
| <b>hsa-miR-30a-3p</b>  | MIMAT0000088                     | 0.00300506     | 0.0223877                   | 1.97                                         |
| <b>hsa-miR-10b-5p</b>  | MIMAT0000254                     | 0.00344579     | 0.0242926                   | 2.27                                         |
| <b>hsa-miR-342-3p</b>  | MIMAT0000753                     | 0.00374986     | 0.0242926                   | -1.42                                        |
| <b>hsa-miR-30d-5p</b>  | MIMAT0000245                     | 0.0050217      | 0.0311764                   | -1.56                                        |
| <b>hsa-miR-99a-5p</b>  | MIMAT0000097                     | 0.00869561     | 0.0479869                   | -1.53                                        |
| <b>hsa-miR-186-5p</b>  | MIMAT0000456                     | 0.00916246     | 0.0487574                   | -1.82                                        |
| hsa-miR-29c-3p         | MIMAT0000681                     | 0.0128246      | 0.0658917                   | -2.30                                        |
| hsa-miR-125b-5p        | MIMAT0000423                     | 0.0152542      | 0.0703421                   | -1.81                                        |
| hsa-miR-141-3p         | MIMAT0000432                     | 0.0153462      | 0.0703421                   | -2.39                                        |
| hsa-miR-29a-3p         | MIMAT0000086                     | 0.0165233      | 0.0703421                   | -1.98                                        |

|                 |              |           |           |       |
|-----------------|--------------|-----------|-----------|-------|
| hsa-miR-423-3p  | MIMAT0001340 | 0.0157835 | 0.0703421 | -2.09 |
| hsa-let-7d-5p   | MIMAT0000065 | 0.0182103 | 0.0733995 | -1.55 |
| hsa-let-7g-5p   | MIMAT0000414 | 0.0201917 | 0.0791726 | -1.83 |
| hsa-miR-106b-3p | MIMAT0004672 | 0.0224152 | 0.0844421 | 2.22  |
| hsa-miR-200b-3p | MIMAT0000318 | 0.0242639 | 0.0848491 | -1.90 |
| hsa-miR-210-3p  | MIMAT0000267 | 0.023436  | 0.0848491 | -2.61 |
| hsa-miR-23b-3p  | MIMAT0000418 | 0.0244866 | 0.0848491 | -1.53 |
| hsa-miR-126-5p  | MIMAT0000444 | 0.0271086 | 0.0917996 | -1.63 |
| hsa-miR-199a-3p | MIMAT0000232 | 0.033552  | 0.111094  | -1.78 |
| hsa-miR-27a-3p  | MIMAT0000084 | 0.0358393 | 0.116088  | -1.43 |
| hsa-miR-192-5p  | MIMAT0000222 | 0.0427578 | 0.132727  | 1.53  |
| hsa-miR-126-3p  | MIMAT0000445 | 0.0459036 | 0.133498  | -1.67 |
| hsa-miR-30e-3p  | MIMAT0000693 | 0.0443316 | 0.133498  | 1.76  |
| hsa-miR-21-3p   | MIMAT0004494 | 0.0512584 | 0.13744   | 1.66  |
| hsa-miR-769-5p  | MIMAT0003886 | 0.0516551 | 0.13744   | 1.73  |
| hsa-miR-98-5p   | MIMAT0000096 | 0.0499349 | 0.13744   | -1.37 |



**Supplementary Table S5.** Significant GO Terms of Predicted Targets of miR-10b-5p from miRTarBase

| <b>ID</b>  | <b>Gene Ontology Term<br/>Biological Process</b>                     | <b>P value</b> | <b>Only Validated miR-10 Targets and/or<br/>Epithelial-Related Genes Included</b>              |
|------------|----------------------------------------------------------------------|----------------|------------------------------------------------------------------------------------------------|
| GO:0000122 | Negative regulation of transcription from RNA polymerase II promoter | 0.00085        | PPARA, TP53, PAX6, HOXB3, STAT6, NOTCH1, TFAP2C, NCOR2, KLF4                                   |
| GO:0048715 | Negative regulation of oligodendrocyte differentiation               | 0.00107        | NOTCH1, NF1                                                                                    |
| GO:0000082 | G1/S transition of mitotic cell cycle                                | 0.00135        | CDKN1A, CDKN2A, CDK2                                                                           |
| GO:0045944 | Positive regulation of transcription from RNA polymerase II promoter | 0.00144        | PPARA, PAX6, HOXD10, STAT6, CDKN2A, TP53, DDX58, NOTCH1, TFAP2C, KLF4                          |
| GO:0045893 | Positive regulation of transcription, DNA-templated                  | 0.00194        | PPARA, TP53, PAX6, FZD2, CDK2, NOTCH1, CDKN2A, KLF4                                            |
| GO:0006351 | Transcription, DNA-templated                                         | 0.00206        | PAX6, HOXD1, HOXD10, HOXD11, STAT6, CSNK2A1, CDKN2A, POU2F2, TP53, HOXB3, TCF19, TCF15, NCOR2, |
| GO:0060070 | Canonical Wnt signaling pathway                                      | 0.00242        | SDC1, FZD2, PTEN, KLF4                                                                         |
| GO:0060740 | Prostate gland epithelium morphogenesis                              | 0.00521        | NOTCH1, RARG, ID4                                                                              |
| GO:0007265 | Ras protein signal transduction                                      | 0.00552        | CDKN1A, CDKN2A, NF1, TP53, CDK2                                                                |
| GO:0006355 | Regulation of transcription, DNA-templated                           | 0.00739        | PAX6, HOXD1, HOXD11, CSNK2A1, POU2F2, TP53, HOXB3, NOTCH1, ALKBH4                              |
| GO:0006915 | Apoptotic process                                                    | 0.01143        | HTATIP2, TP53, PDCD4, PTEN, BCL2L11, CSNK2A1, CDKN2A, TIAM1, PPP1R13B,                         |
| GO:0006367 | Transcription initiation from RNA polymerase II promoter             | 0.01202        | PPARA, NOTCH1, RARG, NCOA6, NR4A3,                                                             |
| GO:0008284 | Positive regulation of cell proliferation                            | 0.01202        | RARG, PTEN, CDK2, NOTCH1, CSNK2A1, TIAM1, ID4,                                                 |
| GO:0031065 | Positive regulation of histone deacetylation                         | 0.01306        | SREBF1, CTBP1, TP53                                                                            |
| GO:0031571 | Mitotic G1 DNA damage checkpoint                                     | 0.013063       | TP53, FBXO31, CDK2                                                                             |
| GO:0003700 | transcription factor activity, sequence-specific DNA binding         | 0.01380        | PPARA, PAX6, HOXD10, STAT6, POU2F2, RARG, TP53, HOXB3, NOTCH1, TCF19, TFAP2C, TCF15, KLF4      |
| GO:0090399 | Replicative senescence                                               | 0.01551        | CDKN1A, CDKN2A, TP53                                                                           |
| GO:0008285 | Negative regulation of cell proliferation                            | 0.01633        | CDC6, CTBP1, RARG, TP53, PTEN,                                                                 |

|            |                                                                                                               |         |                                                                      |
|------------|---------------------------------------------------------------------------------------------------------------|---------|----------------------------------------------------------------------|
|            |                                                                                                               |         | NOTCH1, CDKN1A, CDKN2A, KLF4                                         |
| GO:0045787 | Positive regulation of cell cycle                                                                             | 0.01738 | RPS15A, NR4A3, BCL2L11, C6ORF89                                      |
| GO:0008134 | Transcription factor binding                                                                                  | 0.01799 | PPARA, CTBP1, CDKN2A, GATA3, TP53, PAX6, FHL2, PPP1R13B, RORA, NCOR2 |
| GO:0031100 | Organ regeneration                                                                                            | 0.02218 | CDKN1A, NOTCH1, AXL, NR4A3, CDK2                                     |
| GO:0043087 | Regulation of GTPase activity                                                                                 | 0.02218 | EPHA4, RALBP1, NF1, PAFAH1B1, CRK                                    |
| GO:0000079 | Regulation of cyclin-dependent protein serine/threonine kinase activity                                       | 0.02338 | CDC6, CDKN1A, CCNG1, PTEN                                            |
| GO:0031647 | Regulation of protein stability                                                                               | 0.02939 | SREBF1, CDKN2A, USP3, LSS, PTEN                                      |
| GO:0001649 | Osteoblast differentiation                                                                                    | 0.03335 | SFRP1, NF1, FASN, FHL2, H3F3B, TPM4                                  |
| GO:0001077 | Transcriptional activator activity, RNA polymerase II core promoter proximal region sequence-specific binding | 0.03695 | SREBF1, PPARA, GATA3, ONECUT3, POU2F2, PAX6, TFAP2C, NR4A3, KLF4     |
| GO:0001085 | RNA polymerase II transcription factor binding                                                                | 0.04070 | GATA3, TP53, ID4, KLF4                                               |
| GO:1902263 | Apoptotic process involved in embryonic digit morphogenesis                                                   | 0.04783 | NOTCH1, BCL2L11                                                      |

**Supplementary Table S6.** Primers used for QRT-PCR

| Gene                    | Sequence (forward & reverse, 5'-3') | Accession number | Amplicon size |
|-------------------------|-------------------------------------|------------------|---------------|
| $\beta$ 2-Microglobulin | GGA CTG GTC TTT CTA TCT CTT GT      | NM_004048.2      | 143           |
| Integrated DNA Tech.    |                                     |                  |               |
| B2M                     | ACC TCC ATG ATG CTG CTT AC          |                  |               |
| HS.PT.58V.18759587      |                                     |                  |               |
| $\beta$ -Actin          | GTC CCC CAA CTT GAG ATG TAT G       | NM_001101.3      | 83            |
| Integrated DNA Tech.    |                                     |                  |               |
| $\beta$ -Actin          | AAG TCA GTG TAC AGG TAA GCC         |                  |               |
| HS.PT.39A.22214847      |                                     |                  |               |
| SOX9                    | GAC TTC CGC GAC GTG GAC             | NM_000346.3      | 99            |
| SOX9                    | GTT GGG CGG CAG GTA CTG             |                  |               |
| OCT-4                   | GGG AAG GTA TTC AGC CAA AC          | NM_001173531.2   | 145           |
| OCT-4                   | CTG CTT TGC ATA TCT CCT GAA G       |                  |               |
| N-Cadherin              | CAA GAG CTT GTC AGG ATC AG          | NM_001792.4      | 184           |
| CDH2                    | CAT GTG CCC TCA AAT GAA AC          |                  |               |
| PAX6                    | CCT GGA GAA AGA GTT TGA GAG         | NM_001258464.1   | 124           |
| PAX6                    | CCA TTT GGC CCT TCG ATT A           |                  |               |
| Keratin 3               | GAA GAA GGA TGT GGA CAG TG          | NM_057088.2      | 178           |
| KRT3                    | GTC CAG GGA GCG ATT ATT G           |                  |               |
| Keratin 12              | GCT GAA GCC TGG TTC ATT             | NM_000223.3      | 156           |
| KRT12                   | TTT CTT CAT GGC GAG CTG             |                  |               |
| Keratin 14              | CCT GCT GAG ATC AAA GAC TAC         | NM_000526.4      | 150           |
| KRT14                   | CTC ATA CTT GGT GCG GAA G           |                  |               |
| Keratin 15              | CGA AGA GGA GAT GAA GGA GTT C       | NM_002275.3      | 226           |
| KRT15                   | CTT GCT GGT CTG GAT CAT TTC         |                  |               |
| Keratin 18              | TCA GAG ACT GGA GCC ATT A           | NM_000224.2      | 149           |
| KRT18                   | CAG CTC TGT CTC ATA CTT GAC         |                  |               |
| Keratin 17              | TGA GCT GGA GGT GAA GAT             | NM_000422.2      | 200           |

|               |                               |                |     |
|---------------|-------------------------------|----------------|-----|
| KRT17         | GCT CTG TCT CAA ACT TGG T     |                |     |
| Vimentin      | CAG GAT TTC TCT GCC TCT TC    | NM_003380.3    | 143 |
| VIM           | CGT TGA TAA CCT GTC CAT CTC   |                |     |
| DKK1          | TGG AAT ATG TGT GTC TTC TGA T | NM_012242.2    | 157 |
| DKK1          | AGA ACC TTC TTG TCC TTT GG    |                |     |
| EPHB2         | TCC TCT GGC ATC AAC CT        | NM_017449.4    | 165 |
| EPHB2         | CTC CAT CAT CAT CTG AGA CAC   |                |     |
| P4HB          | GAA TAT ACA GCT GGC AGA GAG   | NM_000918.3    | 154 |
| P4HB          | ACT CCA CGT CCT TGA AGA       |                |     |
| HBEGF         | GTG CTG TCA TCT GTC TGT C     | NM_001945.2    | 151 |
| HBEGF         | CAG CCG ATT CCT TGA GC        |                |     |
| EDEM1         | CTT TGA GGC CAC GAT AAG G     | NM_014674.2    | 199 |
| EDEM1         | TAG ATT CAC CCG AGG ATA TGG   |                |     |
| KLF4          | CAC ATT AAT GAG GCA GCC A     | NM_004235.5    | 166 |
| KLF4          | TCG CTT CAT GTG GGA GA        |                |     |
| PTEN          | CGG AAC TTG CAA TCC TCA G     | NM_000314.6    | 136 |
| PTEN          | GAT ATC ACC ACA CAC AGG TAA C |                |     |
| GSK3B         | CTC CAG TGG TGA GAA GAA AG    | NM_001146156.1 | 153 |
| GSK3B         | CTT CGG AAC AGC TGA TAC AT    |                |     |
| TP53          | GCA CTA AGC GAG CAC TG        | NM_001276695.1 | 119 |
| TP53          | CAG GAA GTA ACA CCA TCG TAA G |                |     |
| $\Delta$ Np63 | TGT ACC TGG AAA ACA ATG CCC A | NM_001114982.1 | 103 |
| $\Delta$ Np63 | GAC GAG GAG CCG TTC TGA ATC T |                |     |
| WNT7A         | GCCAAGGTCTTTGTGGATGC          | NM_004625.3    | 99  |
| WNT7A         | GTTCTCCTCCAGGATCTTTCGG        |                |     |
